# Supplementary material for: A molecular mechanics approach to mapping the conformational space of diaryl and triarylphosphines
Source: Royal Society of Chemistry journal article supplement (doi:10.1039/b610123b), 2006-01-01
Supplement: b610123b.pdf [file b610123b.pdf]

## A Molecular Mechanics Approach to Mapping the Conformational Space of Diaryl and Triarylphosphines

Natalie Fey, James A.S. Howell, Jonathan D. Lovatt, Paul C. Yates, Desmond Cunningham, Patrick McArdle, Hugo E. Gottlieb and Simon J. Coles

### SUPPLEMENTARY INFORMATION

#### A. NMR SPECTRAL DATA

Chemical shifts are in ppm relative to SiMe<sub>4</sub> (<sup>1</sup>H and <sup>13</sup>C) or 85 % H<sub>3</sub>PO<sub>4</sub> (<sup>31</sup>P). For <sup>13</sup>C spectra, numbers in parentheses are P-C coupling constants in Hz.

**1. 2-<sup>i</sup>PrC<sub>6</sub>H<sub>4</sub>Br.** <sup>1</sup>H NMR (CDCl<sub>3</sub>): 7.0-7.5 (4H, m, Ph), 3.35 (1H, sept, CHMe<sub>2</sub>), 1.23 (6H, d, CHMe<sub>2</sub>, J = 6.8 Hz); <sup>13</sup>C NMR (CDCl<sub>3</sub>): 124.3, 126.6, 127.2, 127.6, 132.7, 147.3, 32.8, 22.7.

**2. 2-<sup>t</sup>BuC<sub>6</sub>H<sub>4</sub>I.** <sup>1</sup>H NMR (CDCl<sub>3</sub>): 6.83-8.02 (4H, m, Ph), 1.55 (s, <sup>t</sup>Bu); <sup>13</sup>C NMR (CDCl<sub>3</sub>): 95.1, 127.5, 127.6, 127.9, 143.5, 150.1, 36.7, 29.8.

**3. (2-EtC<sub>6</sub>H<sub>4</sub>)<sub>3</sub>P.** <sup>1</sup>H NMR (CDCl<sub>3</sub>): 7.20-7.31 (6H, m, H<sub>3</sub>, 4), 7.05 (3H, m, H<sub>5</sub>), 6.73 (3H, dd, H<sub>6</sub>), 2.59 (6H, q, CH<sub>2</sub>CH<sub>3</sub>, J = 7.5 Hz), 1.12 (9H, t, CH<sub>2</sub>CH<sub>3</sub>); <sup>31</sup>P NMR (CDCl<sub>3</sub>): -33.7; <sup>13</sup>C NMR (CDCl<sub>3</sub>): 134.9 (12, C1), 148.5 (26, C2), 128.1 (5, C3), 128.8 (C4), 126.0 (5, C5), 133.9 (C6), 27.4 (23, CH<sub>2</sub>CH<sub>3</sub>), 15.1 (3, CH<sub>2</sub>CH<sub>3</sub>).

**4. (2-<sup>i</sup>PrC<sub>6</sub>H<sub>4</sub>)<sub>3</sub>P.** <sup>1</sup>H NMR (CDCl<sub>3</sub>): 7.20-7.35 (6H, m, H<sub>3</sub>, 4), 7.00 (3H, m, H<sub>5</sub>), 6.74 (3H, dd, H<sub>6</sub>), 3.62 (3H, m, CHMe<sub>2</sub>, J = 7.5 Hz), 1.08 (18H, d, CHMe<sub>2</sub>); <sup>31</sup>P NMR (CDCl<sub>3</sub>): -33.3; <sup>13</sup>C NMR (CDCl<sub>3</sub>): 134.8 (13, C1), 153.1 (24, C2), 125.3 (5, C3), 129.0 (C4), 125.9 (C5), 134.0 (C6), 32.8 (25, CHMe<sub>2</sub>), 23.7 (CHMe<sub>2</sub>).

**5. (2-MeC<sub>6</sub>H<sub>4</sub>)<sub>2</sub>(2-<sup>t</sup>BuC<sub>6</sub>H<sub>4</sub>)P.** <sup>1</sup>H NMR (CDCl<sub>3</sub>): 6.80 (2H, dd, H<sub>6</sub>), 6.98-7.31 (9H, m, H<sub>3</sub>-5, 3'-5'), 7.48 (1H, m, H<sub>6'</sub>), 2.30 (6H, s, Me), 1.51 (9H, s, <sup>t</sup>Bu); <sup>31</sup>P NMR (CDCl<sub>3</sub>): -22.1; <sup>13</sup>C NMR (CDCl<sub>3</sub>): 125.8, 126.1, 126.2 (7), 128.3, 129.0 (1), 130.0 (4), 133.2 (br), 133.5 (23), 133.8 (br), 136.8 (14), 137.1 (2), 141.9 (26), 155.0 (26), 21.5 (20, Me), 37.3 (CMe<sub>3</sub>), 31.9 (12, CMe<sub>3</sub>).

**6. (2-MeC<sub>6</sub>H<sub>4</sub>)<sub>2</sub>MeP.** <sup>1</sup>H NMR (CDCl<sub>3</sub>): 7.11-7.20 (8H, m, H<sub>3</sub>-6), 2.39 (6H, s, Me), 1.90 (3H, d PMe, J(PH) = 4.0 Hz); <sup>31</sup>P NMR (CDCl<sub>3</sub>): -46.5; <sup>13</sup>C NMR (CDCl<sub>3</sub>): 137.8 (12, C1), 141.8 (25, C2), 129.9 (5, C3), 128.4 (C4), 126.1 (C5), 130.7 (C6), 11.1 (13, PMe), 21.0 (21, Me).

- 7. (2-MeC<sub>6</sub>H<sub>4</sub>)<sub>2</sub><sup>t</sup>BuP.** <sup>1</sup>H NMR (CDCl<sub>3</sub>): 7.08-7.16 (6H, m, H3-5), 7.37 (2H, m, H6), 1.26 (9H, d, <sup>t</sup>Bu, J(PH) = 13 Hz), 2.33 (6H, s, Me); <sup>31</sup>P NMR (CDCl<sub>3</sub>): -8.7; <sup>13</sup>C NMR(CDCl<sub>3</sub>): 136.5 (19, C1), 143.1 (26, C2), 130.3 (5, C3), 128.0 (C4), 125.1 (C5), 133.4 (C6), 31.2 (14, CMe<sub>3</sub>), 28.5 (15, CMe<sub>3</sub>), 21.7 (22, Me).
- 8. (2-MeC<sub>6</sub>H<sub>4</sub>)<sub>2</sub>MePO.** <sup>1</sup>H NMR (CDCl<sub>3</sub>): 7.18 (2H, dd, H3), 7.40 (2H, t, H4), 7.26 (2H, t, H5), 7.69 (2H, dd, H6), 2.06 (3H, d, PMe, J(PH) = 13 Hz), 2.29 (6H, s, Me); <sup>31</sup>P NMR (CDCl<sub>3</sub>): 31.5; <sup>13</sup>C NMR (CDCl<sub>3</sub>): 131.5 (20, C1), 141.2 (9, C2), 131.7 (7, C3), 131.6 (1, C4), 125.7 (12, C5), 133.0 (C6), 16.8 (74, PMe), 21.1 (4, Me).
- 9. (2-MeC<sub>6</sub>H<sub>4</sub>)<sub>2</sub><sup>t</sup>BuPO.** <sup>1</sup>H NMR (CDCl<sub>3</sub>): 7.15-7.18 (4H, m, H3, 5), 7.33 (2H, m, H4), 7.56 (2H, dd, H6), 1.38 (9H, d, <sup>t</sup>Bu, J(PH) = 14 Hz), 2.38 (6H, s, Me); <sup>31</sup>P NMR (CDCl<sub>3</sub>): 47.2; <sup>13</sup>C NMR (CDCl<sub>3</sub>): 130.9 (89, C1), 143.4 (6, C2), 131.8 (11, C3), 131.0 (3, C4), 124.6 (12, C5), 132.4 (10, C6), 35.4 (69, CMe<sub>3</sub>), 25.9 (CMe<sub>3</sub>), 21.5 (4, Me).
- 10. (2-EtC<sub>6</sub>H<sub>4</sub>)<sub>3</sub>PO.** <sup>1</sup>H NMR (CDCl<sub>3</sub>): 7.32-7.49 (6H, m, H3, 4), 7.00-7.15 (6H, m, H5, 6), 2.97 (6H, q, CH<sub>2</sub>CH<sub>3</sub>, J = 7.4 Hz), 1.02 (9H, t, CH<sub>2</sub>CH<sub>3</sub>); <sup>31</sup>P NMR (CDCl<sub>3</sub>): 34.8; <sup>13</sup>C NMR (CDCl<sub>3</sub>): 131.0 (103, C1), 149.6 (8, C2), 130.0 (11, C3), 131.8 (2, C4), 125.2 (13, C5), 133.0 (12, C6), 27.6 (4, CH<sub>2</sub>CH<sub>3</sub>), 15.1 (2, CH<sub>2</sub>CH<sub>3</sub>).
- 11. (2-<sup>i</sup>PrC<sub>6</sub>H<sub>4</sub>)<sub>3</sub>PO.** <sup>1</sup>H NMR (CDCl<sub>3</sub>): 7.10-7.30 (6H, m, H3, 5), 7.45-7.55 (6H, m, H4, 6), 3.65 (3H, m, CHMe<sub>2</sub>, J = 6.3 Hz), 1.01 (18H, d, CHMe<sub>2</sub>); <sup>31</sup>P NMR (CD<sub>2</sub>Cl<sub>2</sub>): 38.2; <sup>13</sup>C NMR (CDCl<sub>3</sub>): 131.1 (102, C1), 154.3 (8, C2), 127.3 (11, C3), 131.9 (3, C4), 125.1 (13, C5), 132.9 (13, C6), 31.3 (4, CHMe<sub>2</sub>), 23.9 (CHMe<sub>2</sub>).
- 12. (2-MeC<sub>6</sub>H<sub>4</sub>)<sub>2</sub>(2-<sup>t</sup>BuC<sub>6</sub>H<sub>4</sub>)PO.** <sup>1</sup>H NMR (CDCl<sub>3</sub>): 6.60 (1H, dd, H6'), 6.87 (1H, dd, H5'), 6.98-7.11 (4H, m), 7.23-7.48 (5H, m), 7.68 (1H, dd, H6'), 2.45, 2.60 (6H, s, Me), 1.54 (9H, s, <sup>t</sup>Bu); <sup>31</sup>P NMR (CDCl<sub>3</sub>): 43.4; <sup>13</sup>C NMR (CDCl<sub>3</sub>): 124.6 (14), 124.9 (13), 125.0 (13), 128.0 (11), 129.5 (95), 131.3-132.6 (m), 131.9 (100), 133.3 (13), 134.0 (105), 135.2 (15), 142.7 (7), 144.0 (7), 157.4 (6), 37.6 (2, CMe<sub>3</sub>), 32.5 (CMe<sub>3</sub>), 21.6, 22.3 (4, Me).
- 13. (2-MeC<sub>6</sub>H<sub>4</sub>)<sub>2</sub>MePS.** <sup>1</sup>H NMR (CDCl<sub>3</sub>): 7.14 (2H, t, H3), 7.31-7.42 (4H, m, H4, 5), 8.11 (2H, dd, H6), 2.31 (3H, d, PMe, J(PH) = 13 Hz), 2.09 (6H, s, Me); <sup>31</sup>P NMR (CDCl<sub>3</sub>): 35.1; <sup>13</sup>C NMR (CDCl<sub>3</sub>): 131.6 (79, C1), 140.1 (9, C2), 131.9 (1, C3), 131.7 (3, C4), 126.3 (13, C5), 132.0 (C6), 21.9 (60, PMe), 21.3 (5, Me).

**14. (2-MeC<sub>6</sub>H<sub>4</sub>)<sub>2</sub>tBuPS.** <sup>1</sup>H NMR (CDCl<sub>3</sub>): 7.13 (2H, m(br), H3), 7.23-7.37 (4H, m(br), H4, 5), 7.6-8.5 (2H, m(br), H6), 1.44 (9H, d, <sup>t</sup>Bu, J(PH) = 16 Hz), 2.10 (6H, s(br), Me); <sup>31</sup>P NMR (CDCl<sub>3</sub>): 57.3; <sup>13</sup>C NMR (CDCl<sub>3</sub>): 129-135 (br, C1, 3, 4, 6), 142.0 (br, C2), 125.5 (12, C5), 38.0 (60, CMe<sub>3</sub>), 26.6 (CMe<sub>3</sub>), 22.2 (br, Me).

**15. (2-<sup>i</sup>PrC<sub>6</sub>H<sub>4</sub>)<sub>3</sub>PS.** <sup>1</sup>H NMR (CDCl<sub>3</sub>): 7.40-7.55 (6H, m, H3, 4), 7.25 (3H, t, H5), 7.78 (3H, m(br), H6), 3.47 (3H, br, CHMe<sub>2</sub>), 0.90, (18H, br, CHMe<sub>2</sub>); <sup>31</sup>P NMR (CD<sub>2</sub>Cl<sub>2</sub>): 45.5; <sup>13</sup>C NMR(CDCl<sub>3</sub>): 130.4 (81, C1), 153.3 (9, C2), 128.1 (10, C3), 131.9 (2, C4), 125.4 (13, C5), 133.1 (br, C6), 31.6 (5, CHMe<sub>2</sub>), 23.5 (br, CHMe<sub>2</sub>).

**16. (2-MeC<sub>6</sub>H<sub>4</sub>)<sub>2</sub>MePSe.** <sup>1</sup>H NMR (CDCl<sub>3</sub>): 7.08 (2H, t, H3), 7.28-7.37 (4H, m, H4, 5), 8.11 (2H, dd, H6), 2.47 (3H, d, PMe, J(PH) = 13 Hz), 2.03 (6H, s, Me); <sup>31</sup>P NMR (CDCl<sub>3</sub>): 21.3 (J(SeP) = 704 Hz); <sup>13</sup>C NMR (CDCl<sub>3</sub>): 130.0 (71, C1), 140.1 (8, C2), 132.0 (10, C3), 131.8 (3, C4), 126.5 (13, C5), 132.7 (13, C6), 22.4 (53, PMe), 21.2 (5, Me).

**17. (2-MeC<sub>6</sub>H<sub>4</sub>)<sub>2</sub><sup>t</sup>BuPSe.** <sup>1</sup>H NMR (CDCl<sub>3</sub>): 7.0-7.4 (6H, m, H3-5), 7.75 (2H, t, H2), 8.62 (2H, br, H6); <sup>31</sup>P NMR (CDCl<sub>3</sub>): 49.9 (J(SeP) = 696 Hz), <sup>13</sup>C NMR (CDCl<sub>3</sub>): 140.2, 142.7 (br, C2), 131.8, 133.3 (10, 9, C3), 131.1, 131.4 (C4), 125.5, 125.9 (12, 13, C5), 128.8, 136.6 (br, C6), 37.3 (40, CMe<sub>3</sub>), 27.0 (CMe<sub>3</sub>), 22.2 (4, Me).

**18. (2-MeC<sub>6</sub>H<sub>4</sub>)<sub>2</sub>MePCr(CO)<sub>5</sub>.** <sup>1</sup>H NMR (CDCl<sub>3</sub>): 7.18 (2H, m, H3), 7.36-7.40 (4H, m, H4, 5), 7.81 (2H, m, H6), 2.09 (3H, d, PMe, J(P-H) = 6.0 Hz), 1.92 (6H, s, Me); <sup>31</sup>P NMR (CD<sub>2</sub>Cl<sub>2</sub>): 37.9; <sup>13</sup>C NMR(CD<sub>2</sub>Cl<sub>2</sub>): 134.2 (31, C1), 140.0 (4, C2), 131.5 (6, C3), 129.9 (2, C4), 126.3 (11, C5), 130.7 (17, C6), 17.9 (28, PMe), 20.9 (5, Me), 221.6 (7, CO<sub>trans</sub>), 216.5 (13, CO<sub>cis</sub>); Infrared (ν<sub>max</sub>/cm<sup>-1</sup>; hexane): 2063, 1949, 1944, 1937.

**19. (2-MeC<sub>6</sub>H<sub>4</sub>)<sub>2</sub><sup>t</sup>BuPCr(CO)<sub>5</sub>.** <sup>1</sup>H NMR (CDCl<sub>3</sub>): 7.1-7.3 (6H, m, H3-5), 7.95 (2H, m, H6), 1.30 (9H, d, <sup>t</sup>Bu, J(P-H) = 13 Hz), 2.04 (6H, s, Me); <sup>31</sup>P NMR (CDCl<sub>3</sub>): 67.7 (exo<sub>2</sub>), 52.3 (exo<sub>1a</sub>), <sup>13</sup>C NMR (CDCl<sub>3</sub>): 141.8-124.1 (C1-6), 30.2 (br, Me), 23.0 (br, <sup>t</sup>Bu), 221.6 (6, CO<sub>trans</sub>), 216.8 (11, CO<sub>cis</sub>); infrared: (ν<sub>max</sub>/cm<sup>-1</sup>; hexane): 2051, 1971, 1937.

**B. FORCE FIELD PARAMETERISATION**

**Table 1.** HF and DFT Geometric and Energetic Comparison for XPH<sub>2</sub>R Series (X = lone pair, O, S; R = Me, Bu<sup>t</sup>, Ph)

(a) XPH<sub>2</sub>Me Series

|                                                  | PH <sub>2</sub> Me | OPH <sub>2</sub> Me | SPH <sub>2</sub> Me |
|--------------------------------------------------|--------------------|---------------------|---------------------|
| <i>DFT method</i>                                |                    |                     |                     |
| H-C-P-X rotational barrier/ kJ mol <sup>-1</sup> | 5.13               | 6.75                | 6.95                |
| H-P-H (ground state) <sup>o</sup>                | 93.3               | 100.9               | 100.3               |
| H-P-H (transition state) <sup>o</sup>            | 92.7               | 100.8               | 99.9                |
| H-P-C (ground state) <sup>o</sup>                | 97.6               | 102.7               | 102.1               |
| H-P-C (transition state) <sup>o</sup>            | 98.1               | 103.4               | 102.7               |
| H-C-P-X (ground state) <sup>o</sup>              | 58*                | 60                  | 60                  |
| H-C-P-X (transition state) <sup>o</sup>          | 0*                 | 0                   | 0                   |
| <i>HF method</i>                                 |                    |                     |                     |
| H-C-P-X rotational barrier/ kJ mol <sup>-1</sup> | 7.25               | 6.85                | 7.37                |
| H-P-H (ground state) <sup>o</sup>                | 92.8               | 99.4                | 97.4                |
| H-P-H (transition state) <sup>o</sup>            | 92.3               | 99.1                | 99.9                |
| H-P-C (ground state) <sup>o</sup>                | 95.7               | 100.6               | 98.7                |
| H-P-C (transition state) <sup>o</sup>            | 96.3               | 101.4               | 102.7               |
| H-C-P-X (ground state) <sup>o</sup>              | 59*                | 60                  | 60                  |
| H-C-P-X (transition state) <sup>o</sup>          | 0*                 | 0                   | 0                   |

(b) XPH<sub>2</sub>Bu<sup>t</sup> Series

|                                                  | PH <sub>2</sub> Bu <sup>t</sup> | OPH <sub>2</sub> Bu <sup>t</sup> | SPH <sub>2</sub> Bu <sup>t</sup> |
|--------------------------------------------------|---------------------------------|----------------------------------|----------------------------------|
| <i>DFT method</i>                                |                                 |                                  |                                  |
| C-C-P-X rotational barrier/ kJ mol <sup>-1</sup> | 8.36                            | 10.3                             | 11.1                             |
| H-P-H (ground state) <sup>o</sup>                | 93.4                            | 101.0                            | 100.6                            |
| H-P-H (transition state) <sup>o</sup>            | 92.7                            | 99.1                             | 100.0                            |
| H-P-C (ground state) <sup>o</sup>                | 97.5                            | 102.9                            | 101.8                            |
| H-P-C (transition state) <sup>o</sup>            | 98.3                            | 102.5                            | 102.5                            |
| C-C-P-X (ground state) <sup>o</sup>              | 59*                             | 60                               | 60                               |
| C-C-P-X (transition state) <sup>o</sup>          | 0                               | 0                                | 0                                |
| <i>HF method</i>                                 |                                 |                                  |                                  |
| C-C-P-X rotational barrier/ kJ mol <sup>-1</sup> | 11.8                            | 12.0                             | 13.7                             |
| H-P-H (ground state) <sup>o</sup>                | 92.9                            | 99.1                             | 97.6                             |
| H-P-H (transition state) <sup>o</sup>            | 92.1                            | 100.0                            | 97.1                             |
| H-P-C (ground state) <sup>o</sup>                | 95.9                            | 100.8                            | 98.8                             |
| H-P-C (transition state) <sup>o</sup>            | 96.8                            | 99.4                             | 99.4                             |
| C-C-P-X (ground state) <sup>o</sup>              | 59*                             | 60                               | 60                               |
| C-C-P-X (transition state) <sup>o</sup>          | 0*                              | 0                                | 0                                |

(c) XPH<sub>2</sub>Ph Series

|                                                                                 | PH <sub>2</sub> Ph | OPH <sub>2</sub> Ph | SPH <sub>2</sub> Ph |
|---------------------------------------------------------------------------------|--------------------|---------------------|---------------------|
| <i>DFT method</i>                                                               |                    |                     |                     |
| C <sub>α</sub> -C <sub>ipso</sub> -P-X rotational barrier/ kJ mol <sup>-1</sup> | 1.19               | 1.96                | 1.26                |
| H-P-H (ground state) <sup>o</sup>                                               | 93.0               | 100.7               | 99.9                |

|                                                                                 |       |       |       |
|---------------------------------------------------------------------------------|-------|-------|-------|
| H-P-H (transition state) <sup>o</sup>                                           | 93.7  | 102.4 | 101.4 |
| H-P-C <sub>ipso</sub> (ground state) <sup>o</sup>                               | 97.8  | 103.5 | 102.4 |
| H-P-C <sub>ipso</sub> (transition state) <sup>o</sup>                           | 97.3  | 101.8 | 101.4 |
| C <sub>α</sub> -C <sub>ipso</sub> -P-X (ground state) <sup>o</sup>              | 0*    | 4     | 4     |
| C <sub>α</sub> -C <sub>ipso</sub> -P-X (transition state) <sup>o</sup>          | 87*   | 89    | 89    |
| <b>HF method</b>                                                                |       |       |       |
| C <sub>α</sub> -C <sub>ipso</sub> -P-X rotational barrier/ kJ mol <sup>-1</sup> | 0.740 | 2.05  | 1.79  |
| H-P-H (ground state) <sup>o</sup>                                               | 93.2  | 98.8  | 97.0  |
| H-P-H (transition state) <sup>o</sup>                                           | 92.3  | 99.9  | 97.9  |
| H-P- C <sub>ipso</sub> (ground state) <sup>o</sup>                              | 95.9  | 101.2 | 99.1  |
| H-P- C <sub>ipso</sub> (transition state) <sup>o</sup>                          | 95.8  | 102.7 | 98.6  |
| C <sub>α</sub> -C <sub>ipso</sub> -P-X (ground state) <sup>o</sup>              | 88*   | 0     | 0     |
| C <sub>α</sub> -C <sub>ipso</sub> -P-X (transition state) <sup>o</sup>          | 0*    | 89    | 90    |

DFT method: calculated using density functional theory with a 6-311G\*\* (d,p) basis set using B3LYP functional

HF method: calculated using Hartree-Fock methods with an STO-3G\* basis set

\* measured through addition of a hydrogen atom to P to mimic lone pair position

- Phenylphosphine **1a** and its oxide and sulphide **1b, c** were used for parameterisation of the XP-PX-C3-C3 term. It is noteworthy that whereas global minima are observed for the oxide and sulphide with an in-plane conformation (XP-PX-C3-C3 = 0/180 °), the energy minimum for the phosphine itself is perpendicular (XP-PX-C3-C3 = 90 °), implying some conjugative stabilisation in the former.

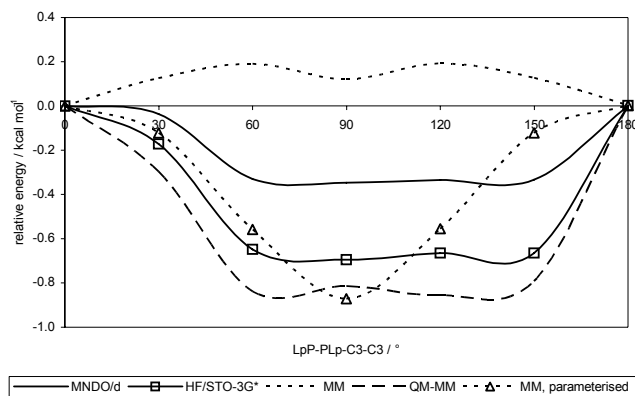

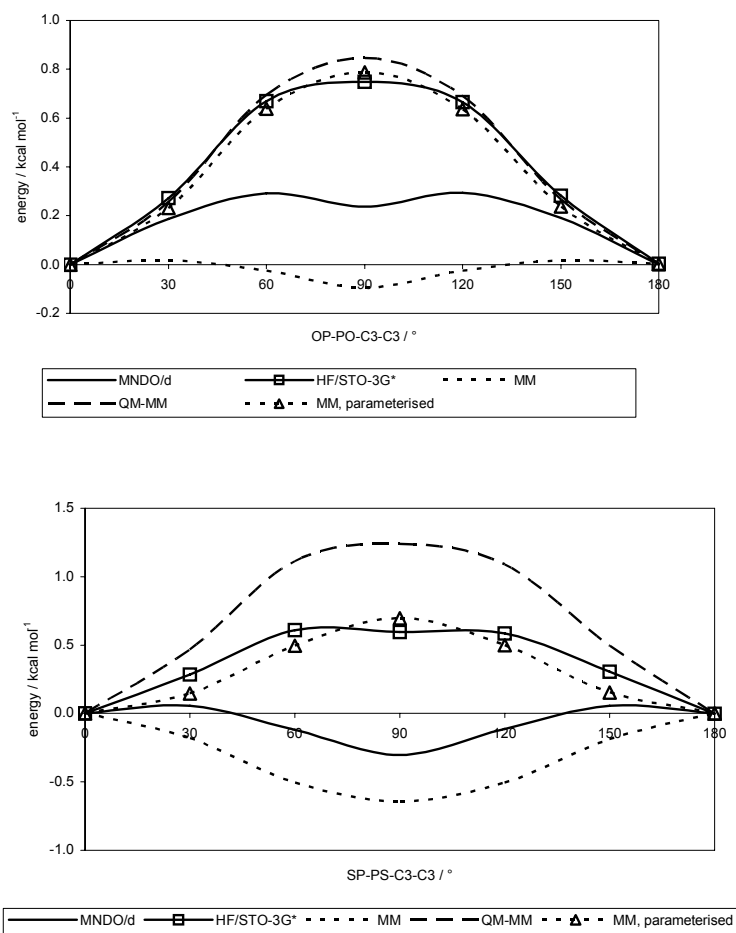

- Diphenylphosphine **2a** and its oxide and sulphide **2b, c** were used for parameterisation of the C3-PX-C3-C3 term. The required torsion to one ring was driven whilst the corresponding torsion to the other ring was allowed to optimise. For the oxide and sulphide, global minima are observed at a perpendicular conformation (C3-PX-C3-C3 = 90 °) rather than a value of 120 °, which would maximise co-planarity of one aryl ring with the X substituent. This perhaps indicates the importance of increased ring-ring and ring-X interactions in determining conformational preference.

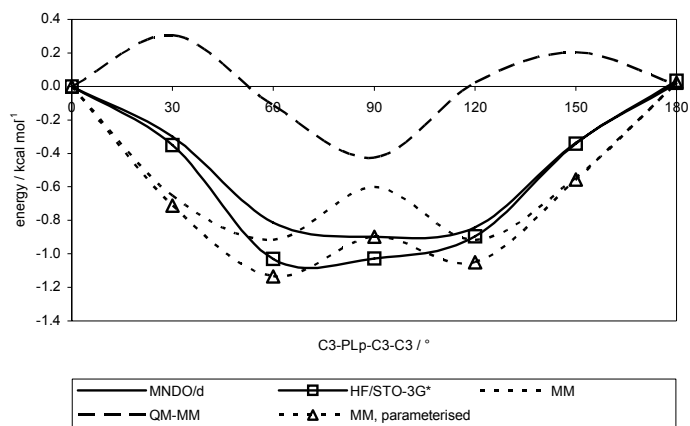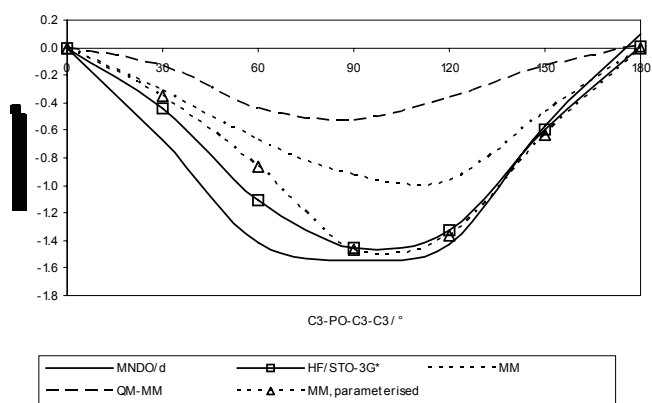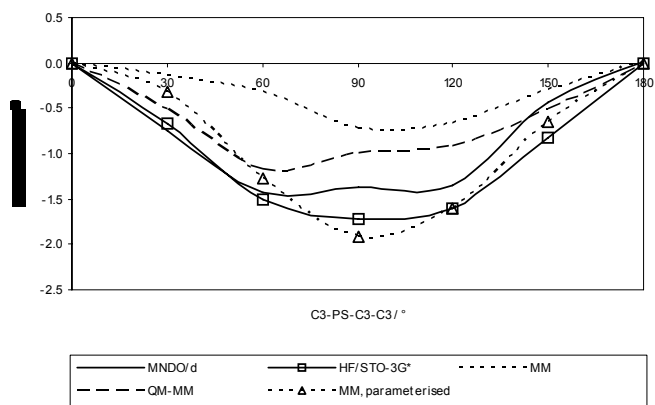

- Methylphosphine **3a** and its oxide and sulphide **3b, c** were used for parameterisation of the H-C4-PX-XP term. As expected, the rotational energy profiles show virtually no dependence on X, giving rise to low  $V_n$  values which are similar for all three compounds. All energy profiles show approximate  $C_3$  symmetry. Unusually, the baseline MM profile (H-C4-PX-XP = 0 °) generates a higher rotational barrier than the HF profile.

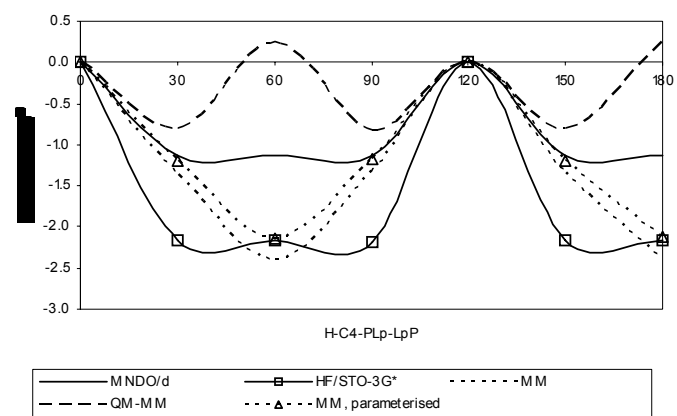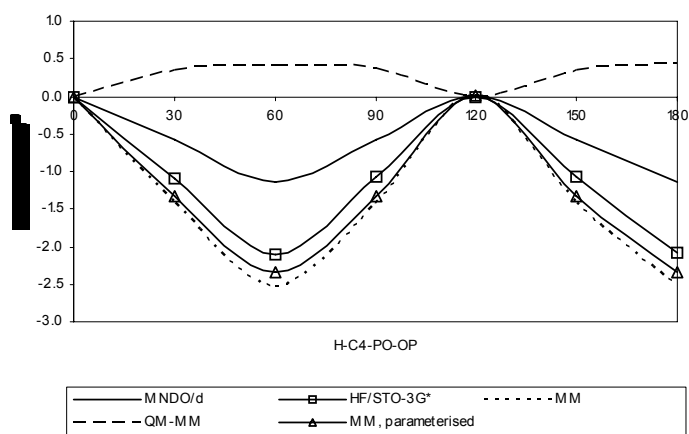



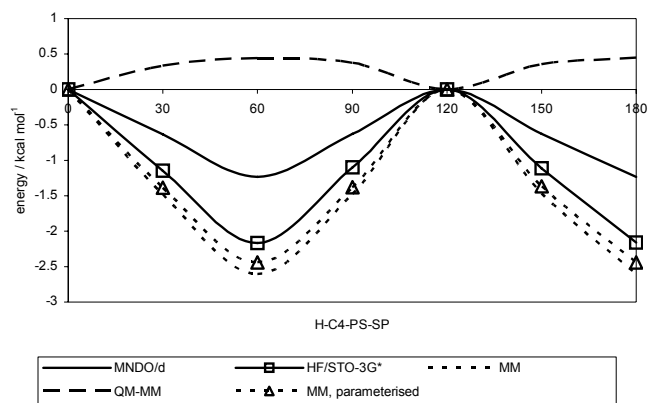

- *tert*-Butylphosphine **4a** and its oxide and sulphide **4b, c** were used for parameterisation of the C4-C4PX-XP term. The profiles are similar to those of **2**, with the expected higher barriers reflected in slightly larger parameters.

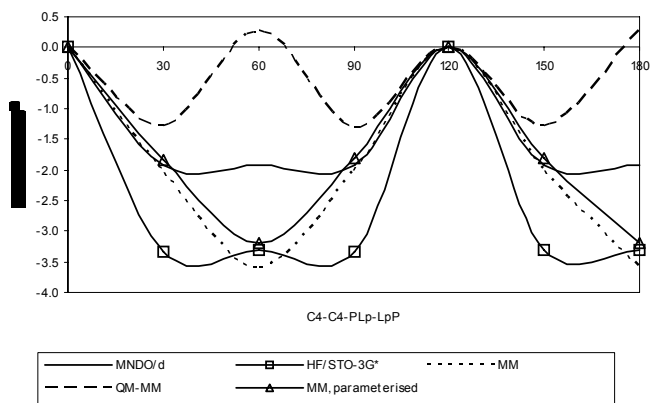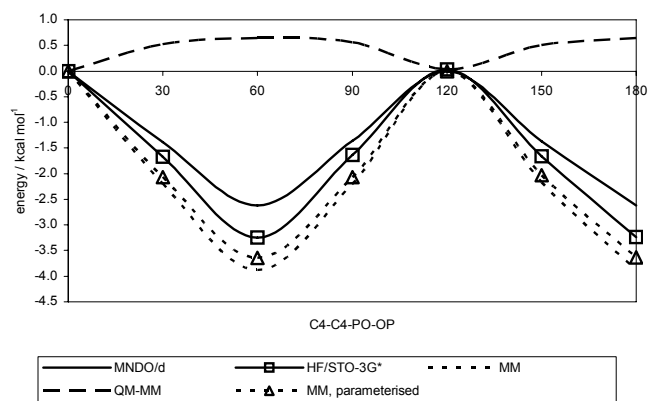

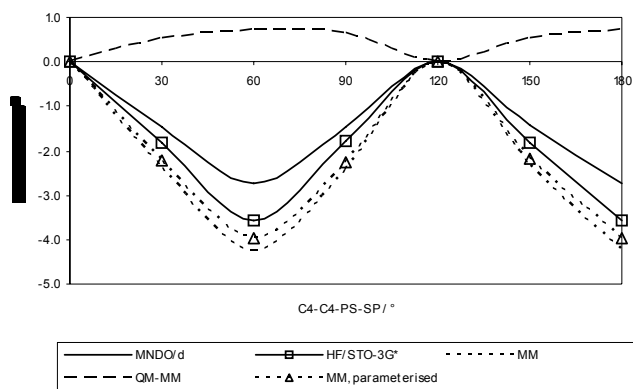

- Methylphenylphosphine **5a** and its oxide and sulphide **5b, c** were used for parameterisation of the C3-C3-PX-C4 term. By analogy with **2**, the aryl ring was driven, whilst the methyl group was allowed to adjust freely.

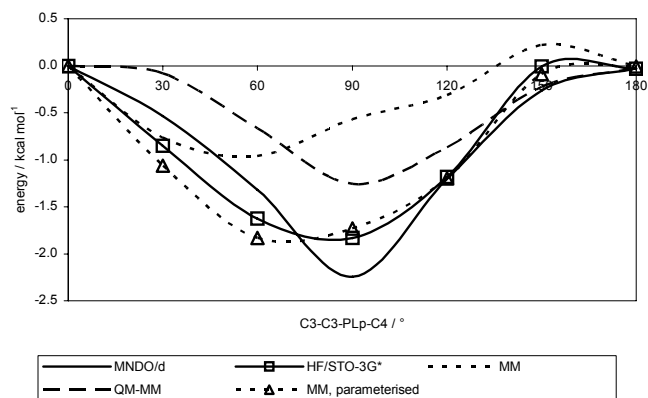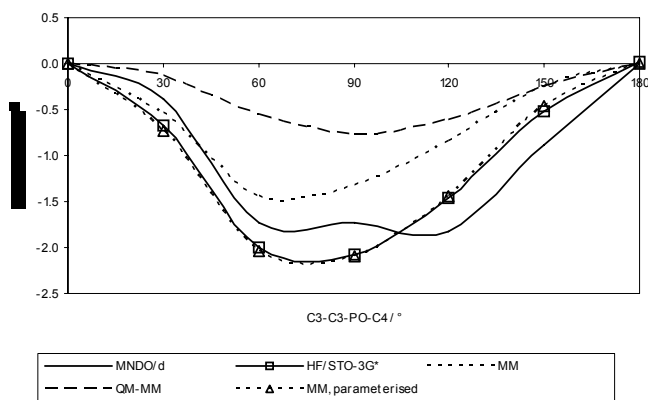

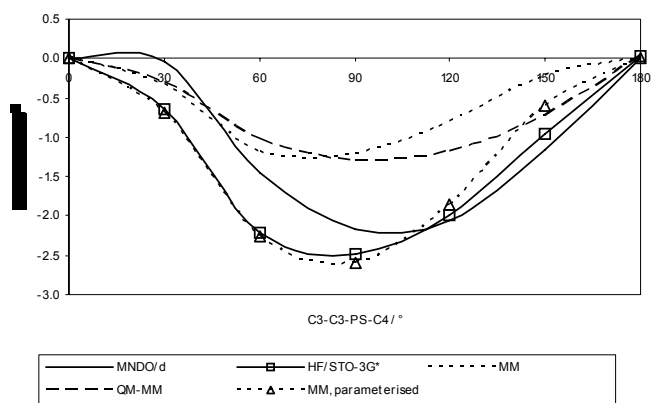

**Table 2.** Added or Modified Molecular Mechanics Parameters

| <i>a) Type</i>     |                            |                                        |
|--------------------|----------------------------|----------------------------------------|
|                    | Mass / g mol <sup>-1</sup> | Description                            |
| LpP                | 0.001                      | Lone Pair for arylphosphines           |
| OP                 | 15.995                     | P=O Oxygen for arylphosphines          |
| SP                 | 31.972                     | P=S Sulphur for arylphosphines         |
| SeP                | 79.917                     | P=Se Selenium for arylphosphines       |
| CrP                | 51.941                     | Cr (VI) for arylphosphines             |
| PLp                | 30.994                     | Lp-P Phosphorus for arylphosphines     |
| PO                 | 30.994                     | O=P Phosphorus for arylphosphines      |
| PS                 | 30.994                     | S=P Phosphorus for arylphosphines      |
| PSe                | 30.994                     | Se=P Phosphorus for arylphosphines     |
| PCr                | 30.994                     | Cr-P Phosphorus for arylphosphines     |
| Cx1, Cx2, Cx3, Cx4 | 12.000                     | Cr(CO) <sub>5</sub> carbon, equatorial |
| Cx5                | 12.000                     | Cr(CO) <sub>5</sub> carbon, axial      |
| Ox1, Ox2, Ox3, Ox4 | 15.995                     | Cr(CO) <sub>5</sub> oxygen, equatorial |
| Ox5                | 15.995                     | Cr(CO) <sub>5</sub> oxygen, axial      |

  

| <i>b) Non-Bonded</i>  |                    |                                            |
|-----------------------|--------------------|--------------------------------------------|
|                       | R* (radius)<br>/ Å | ε (well depth)<br>/ kcal mol <sup>-1</sup> |
| LpP                   | 1.200              | 0.016                                      |
| OP                    | 1.740              | 0.066                                      |
| SP                    | 2.110              | 0.202                                      |
| SeP                   | 2.250              | 0.276                                      |
| CrP                   | 2.210              | 0.302                                      |
| PLp, PO, PS, PSe, PCr | 2.180              | 0.168                                      |
| Cx# (# = 1-5)         | 1.900              | 0.044                                      |
| Ox# (# = 1-5)         | 1.740              | 0.066                                      |

  

| <i>c) Out-Of-Plane</i>     |                                              |
|----------------------------|----------------------------------------------|
|                            | Force constant<br>/ mdyn Å rad <sup>-2</sup> |
| C3-PX (X=Lp, O, S, Se, Cr) | 0.500                                        |
| PO-OP                      | 0.800                                        |
| PX-XP (X=S, Se)            | 0.650                                        |

Table 2. Continued

*d) Stretching*

|                                    | Force constant<br>/ <b>mdyn Å<sup>-1</sup></b> | Equilibrium value<br>/ <b>Å</b> | Dipole Moment<br>/ <b>Debye</b> |
|------------------------------------|------------------------------------------------|---------------------------------|---------------------------------|
| C3-C3                              | 8.065                                          | 1.392                           | 0.000                           |
| H-PX (X=Lp, O, S, Se) <sup>a</sup> | 3.330                                          | 1.371                           | 0.500                           |
| C3-PLp                             | 4.400                                          | 1.820                           | 1.040                           |
| C3-PO                              | 4.400                                          | 1.800                           | 1.040                           |
| C3-PS                              | 4.400                                          | 1.800                           | 1.040                           |
| C3-PSe                             | 4.400                                          | 1.820                           | 1.040                           |
| C3-PCr                             | 4.400                                          | 1.840                           | 1.040                           |
| C4-PLp                             | 2.910                                          | 1.860                           | 0.830                           |
| C4-PO                              | 2.910                                          | 1.830                           | 0.830                           |
| C4-PS                              | 2.910                                          | 1.810                           | 0.830                           |
| C4-PSe                             | 2.910                                          | 1.820                           | 0.830                           |
| C4-PCr                             | 2.910                                          | 1.840                           | 0.830                           |
| LpP-PLp                            | 5.000                                          | 0.730                           | 0.000                           |
| OP-PO                              | 9.000                                          | 1.480                           | -2.567                          |
| SP-PS                              | 3.860                                          | 1.900                           | -2.749                          |
| SeP-PSe                            | 4.220                                          | 2.100                           | -4.477                          |
| CrP-PCr                            | 2.000                                          | 2.350                           | 0.000                           |
| CrP-Cx# (#=1-4)                    | 5.000                                          | 1.860                           | 0.000                           |
| CrP-Cx5                            | 5.000                                          | 1.820                           | 0.000                           |
| Cx1-Ox# (#=1-4)                    | 17.040                                         | 1.120                           | 2.600                           |
| Cx5-Ox5                            | 17.040                                         | 1.150                           | 2.600                           |

<sup>a</sup> relevant to model compounds only

Table 2. Continued

*e) Bending*

|                                       | Force constant<br>/ mdyn Å rad <sup>-2</sup> | Equilibrium value<br>/ ° |
|---------------------------------------|----------------------------------------------|--------------------------|
| C3-PX-H (X=Lp, O) <sup>a</sup>        | 0.480                                        | 100.00                   |
| C3-PX-H (X=S, Se) <sup>a</sup>        | 0.480                                        | 101.00                   |
| C4-PX-H (X=Lp, O, S, Se) <sup>a</sup> | 0.480                                        | 100.00                   |
| H-PX-H (X=Lp, O, S, Se) <sup>a</sup>  | 0.438                                        | 97.00                    |
| H-PLp-LpP*                            | 0.500                                        | 120.00                   |
| H-PX-XP (X=O, S, Se) <sup>a</sup>     | 0.650                                        | 114.00                   |
| C3-PLp-C3                             | 1.500                                        | 100.00                   |
| C3-PO-C3                              | 1.500                                        | 104.00                   |
| C3-PX-C3 (X=S, Se)                    | 0.500                                        | 104.00                   |
| C3-PCr-C3                             | 0.500                                        | 100.00                   |
| C3-PX-C4 (X=Lp, O)                    | 1.500                                        | 103.00                   |
| C3-PX-C4 (X=S, Se, Cr)                | 1.500                                        | 104.00                   |
| C3-PX-XP (X=Lp, O, X, Se, Cr)         | 0.500                                        | 112.00                   |
| C3-PLp-LpP                            | 0.500                                        | 110.00                   |
| C3-PX-XP (X=O, S)                     | 0.500                                        | 113.00                   |
| C3-PX-XP (X=Se, Cr)                   | 0.500                                        | 111.00                   |
| C3-C3-PX (X=Lp, O, S, Se, Cr)         | 0.380                                        | 120.00                   |
| C4-C4-PX (X=Lp, O, S, Se, Cr)         | 0.480                                        | 108.00                   |
| H-C4-PX (X=Lp, O, S, Se, Cr)          | 0.360                                        | 110.00                   |
| PCr-CrP-Cx# (#=1-4)                   | 0.500                                        | 90.00                    |
| PCr-CrP-Cx5                           | 0.400                                        | 180.00                   |
| CrP-Cx#-Ox# (#=1-5)                   | 0.500                                        | 180.00                   |
| Cx1-CrP-Cx2                           | 0.550                                        | 90.00                    |
| Cx1-CrP-Cx3                           | 0.200                                        | 180.00                   |
| Cx1-CrP-Cx4                           | 0.550                                        | 90.00                    |
| Cx1-CrP-Cx5                           | 0.550                                        | 90.00                    |
| Cx2-CrP-Cx2                           | 0.550                                        | 90.00                    |
| Cx2-CrP-Cx2                           | 0.200                                        | 180.00                   |
| Cx2-CrP-Cx2                           | 0.550                                        | 90.00                    |
| Cx3-CrP-Cx2                           | 0.550                                        | 90.00                    |
| Cx3-CrP-Cx2                           | 0.550                                        | 90.00                    |
| Cx4-CrP-Cx2                           | 0.550                                        | 90.00                    |

<sup>a</sup> relevant to model compounds only

Table 2. Continued

*f) Torsions*

|                                          | $V_1 / \text{kcal mol}^{-1}$ | $V_2 / \text{kcal mol}^{-1}$ | $V_3 / \text{kcal mol}^{-1}$ |
|------------------------------------------|------------------------------|------------------------------|------------------------------|
| C4-C3-C3-C3                              | -0.270                       | 9.000                        | 0.000                        |
| C3-C3-C3-C3                              | -0.930                       | 4.800                        | 0.000                        |
| C4-C3-C3-H                               | 0.000                        | 9.000                        | 0.000                        |
| C3-C3-C3-H                               | 0.000                        | 5.405                        | -1.060                       |
| H-C3-C3-H                                | 0.000                        | 9.000                        | 0.000                        |
| C3-C3-PX-H (X=Lp, O, S, Se) <sup>a</sup> | 0.000                        | 0.000                        | 0.000                        |
| C4-C4-PX-H (X=Lp, O, S, Se) <sup>a</sup> | -0.530                       | -0.400                       | 0.600                        |
| H-C4-PX-H (X=Lp, O, S, Se) <sup>a</sup>  | 0.000                        | 0.000                        | 0.428                        |
| C3-C3-C3-PX (X=Lp, O, S, Se, Cr)         | 0.000                        | 16.250                       | 0.000                        |
| C4-C3-C3-PX (X=Lp, O, S, Se, Cr)         | -0.100                       | 10.000                       | 0.000                        |
| H-C3-C3-PX (X=Lp, O, S, Se, Cr)          | 0.000                        | 16.250                       | 0.000                        |
| H-C4-C4-PX (X=Lp, O, S, Se, Cr)          | 0.000                        | 0.000                        | 0.330                        |
| C4-C4-PX-C3 (X=Lp, O, S, Se, Cr)         | -0.500                       | -0.100                       | 0.300                        |
| H-C4-PX-C4 (X=Lp, O, S, Se, Cr)          | 0.050                        | 0.000                        | 0.200                        |
| *-PCr-CrP-*                              | 0.000                        | 0.000                        | 0.000                        |
| PCr-CrP-Cx#-Ox# (# = 1-5)                | 0.000                        | 0.000                        | 0.000                        |
| Ox#-Cx#-PCr-Cx# (# = 1-5)                | 0.000                        | 0.000                        | 0.000                        |

<sup>a</sup> relevant to model compounds only

**C. VARIABLE TEMPERATURE NMR LINESHAPE ANALYSES**

Copies of the spectra from which these quantities are calculated can be obtained from the corresponding author.

| ring exchange (1- or 3- ring flip) |         |                    |                                           |                                           | exo <sub>2</sub> → exo <sub>3</sub> (minor → major)   |                       |           |                    |                                           |                                           |                                                       |
|------------------------------------|---------|--------------------|-------------------------------------------|-------------------------------------------|-------------------------------------------------------|-----------------------|-----------|--------------------|-------------------------------------------|-------------------------------------------|-------------------------------------------------------|
| Compound                           | T/<br>K | k/ s <sup>-1</sup> | ΔG <sup>‡</sup> /<br>kJ mol <sup>-1</sup> | ΔH <sup>‡</sup> /<br>kJ mol <sup>-1</sup> | ΔS <sup>‡</sup> / J K <sup>-1</sup> mol <sup>-1</sup> | Compound              | T/<br>K   | k/ s <sup>-1</sup> | ΔG <sup>‡</sup> /<br>kJ mol <sup>-1</sup> | ΔH <sup>‡</sup> /<br>kJ mol <sup>-1</sup> | ΔS <sup>‡</sup> / J K <sup>-1</sup> mol <sup>-1</sup> |
| <b>3a</b>                          | 203     | 7                  | 45.5 ± 1.7                                |                                           |                                                       | <b>3b<sup>a</sup></b> | 173       | 900                | 31.8 ± 0.8                                |                                           |                                                       |
|                                    | 213     | 25                 | 46.0 ± 0.8                                |                                           |                                                       |                       | 183       | 1600               | 33.0 ± 0.8                                |                                           |                                                       |
|                                    | 223     | 90                 | 45.5 ± 0.4                                |                                           |                                                       |                       | 193       | 4500               | 33.0 ± 0.4                                |                                           |                                                       |
|                                    | 233     | 240                | 46.0 ± 0.4                                | 46.8 ± 5.0                                | 4.2 ± 20.9                                            |                       | 203       | 7000               | 34.3 ± 0.8                                | 25.9 ± 3.3                                | -37.6 ± 16.7                                          |
|                                    | 243     | 700                | 46.0 ± 0.8                                |                                           |                                                       |                       | 213       | 34000              | 33.0 ± 0.8                                |                                           |                                                       |
|                                    | 253     | 1500               | 46.4 ± 1.3                                |                                           |                                                       |                       | 223       | 49000              | 33.9 ± 1.3                                |                                           |                                                       |
|                                    | 268     | 7000               | 45.5 ± 1.7                                |                                           |                                                       |                       | 233       | 80000              | 34.7 ± 1.3                                |                                           |                                                       |
|                                    |         |                    |                                           |                                           |                                                       |                       | <b>3c</b> | 213                | 13                                        | 46.8 ± 0.8                                |                                                       |
|                                    |         |                    |                                           |                                           | 223                                                   | 50                    |           | 46.8 ± 0.4         |                                           |                                           |                                                       |
|                                    |         |                    |                                           |                                           | 233                                                   | 160                   |           | 46.8 ± 0.4         |                                           |                                           |                                                       |
|                                    |         |                    |                                           |                                           | 243                                                   | 450                   |           | 46.8 ± 0.4         |                                           |                                           |                                                       |
|                                    |         |                    |                                           |                                           | 253                                                   | 1150                  |           | 46.8 ± 0.4         |                                           |                                           |                                                       |
|                                    |         |                    |                                           |                                           | 263                                                   | 2800                  |           | 46.8 ± 0.8         | 46.8 ± 5.0                                | 0.0 ± 20.9                                |                                                       |
|                                    |         |                    |                                           |                                           | 273                                                   | 5000                  |           | 47.3 ± 1.3         |                                           |                                           |                                                       |
|                                    |         |                    |                                           |                                           | 293                                                   | 30000                 |           | 46.8 ± 1.7         |                                           |                                           |                                                       |
| <b>4a</b>                          | 203     | 2                  | 48.1 ± 1.7                                |                                           |                                                       |                       |           |                    |                                           |                                           |                                                       |
|                                    | 213     | 12                 | 47.3 ± 0.8                                |                                           |                                                       |                       |           |                    |                                           |                                           |                                                       |
|                                    | 223     | 55                 | 46.8 ± 0.8                                |                                           |                                                       |                       |           |                    |                                           |                                           |                                                       |
|                                    | 233     | 145                | 46.8 ± 0.8                                |                                           |                                                       |                       |           |                    |                                           |                                           |                                                       |
|                                    | 243     | 370                | 47.3 ± 1.3                                |                                           |                                                       |                       |           |                    |                                           |                                           |                                                       |
|                                    | 253     | 920                | 47.3 ± 1.7                                |                                           |                                                       |                       |           |                    |                                           |                                           |                                                       |
|                                    | 263     | 1920               | 47.7 ± 2.1                                |                                           |                                                       |                       |           |                    |                                           |                                           |                                                       |

<sup>a</sup> Data for exo<sub>2</sub> → exo<sub>3</sub> ring exchange. <sup>b</sup> Data from <sup>31</sup>P NMR spectra.



| Compound  | ring exchange (1- or 3- ring flip) |                    |                                            |                                            |                                                           |
|-----------|------------------------------------|--------------------|--------------------------------------------|--------------------------------------------|-----------------------------------------------------------|
|           | T/ K                               | k/ s <sup>-1</sup> | $\Delta G^\ddagger$ / kJ mol <sup>-1</sup> | $\Delta H^\ddagger$ / kJ mol <sup>-1</sup> | $\Delta S^\ddagger$ / J K <sup>-1</sup> mol <sup>-1</sup> |
| <b>4b</b> | 233                                | 4                  | 53.9 ± 1.3                                 |                                            |                                                           |
|           | 243                                | 20                 | 53.1 ± 0.8                                 |                                            |                                                           |
|           | 253                                | 57                 | 53.1 ± 0.8                                 |                                            |                                                           |
|           | 263                                | 150                | 53.1 ± 0.8                                 |                                            |                                                           |
|           | 273                                | 340                | 53.5 ± 1.3                                 | 54.4 ± 5.4                                 | 4.0 ± 20.9                                                |
|           | 283                                | 800                | 53.5 ± 1.7                                 |                                            |                                                           |
|           | 293                                | 2000               | 53.1 ± 2.1                                 |                                            |                                                           |
| <b>4c</b> | 243                                | 95                 | 54.8 ± 2.1                                 |                                            |                                                           |
|           | 253                                | 300                | 54.8 ± 1.3                                 |                                            |                                                           |
|           | 263                                | 600                | 55.6 ± 0.8                                 |                                            |                                                           |
|           | 273                                | 1500               | 55.6 ± 0.4                                 | 47.7 ± 7.9                                 | -29.3 ± 29.3                                              |
|           | 283                                | 3400               | 55.6 ± 0.4                                 |                                            |                                                           |
|           | 293                                | 7100               | 55.6 ± 0.8                                 |                                            |                                                           |
| <b>4d</b> | 283                                | 7                  | 64.4                                       |                                            |                                                           |
|           | 293                                | 25                 | 64.0                                       |                                            |                                                           |
|           | 303                                | 55                 | 64.0                                       |                                            |                                                           |
|           | 318                                | 180                | 64.4                                       | 64.4                                       | 4.18                                                      |
|           | 333                                | 580                | 64.4                                       |                                            |                                                           |
|           | 348                                | 1660               | 64.4                                       |                                            |                                                           |
| <b>5a</b> | 233                                | 5                  | 53.5 ± 0.8                                 |                                            |                                                           |
|           | 243                                | 16                 | 53.5 ± 0.4                                 |                                            |                                                           |
|           | 253                                | 44                 | 53.5 ± 0.8                                 |                                            |                                                           |
|           | 263                                | 120                | 53.5 ± 0.8                                 | 53.5 ± 5.0                                 | -8.4 ± 20.9                                               |
|           | 273                                | 300                | 53.5 ± 0.8                                 |                                            |                                                           |

| Compound  | ring exchange (1-<br>or 3- ring flip) |                       |                                              |                                              |                                                                | Compound              | exo <sub>2</sub> → exo <sub>3</sub> (minor →<br>major) |                       |                                              |                                              |                                                                |
|-----------|---------------------------------------|-----------------------|----------------------------------------------|----------------------------------------------|----------------------------------------------------------------|-----------------------|--------------------------------------------------------|-----------------------|----------------------------------------------|----------------------------------------------|----------------------------------------------------------------|
|           | T/<br>K                               | k/<br>s <sup>-1</sup> | ΔG <sup>‡</sup> /<br>kJ<br>mol <sup>-1</sup> | ΔH <sup>‡</sup> /<br>kJ<br>mol <sup>-1</sup> | ΔS <sup>‡</sup> /<br>J<br>K <sup>-1</sup><br>mol <sup>-1</sup> |                       | T/<br>K                                                | k/<br>s <sup>-1</sup> | ΔG <sup>‡</sup> /<br>kJ<br>mol <sup>-1</sup> | ΔH <sup>‡</sup> /<br>kJ<br>mol <sup>-1</sup> | ΔS <sup>‡</sup> /<br>J<br>K <sup>-1</sup><br>mol <sup>-1</sup> |
| <b>5b</b> | 300                                   | 1.3                   | 72.8 ± 1.3                                   |                                              |                                                                | <b>4b<sup>b</sup></b> | 173                                                    | 65                    | 38.9 ± 1.3                                   |                                              |                                                                |
|           | 313                                   | 4                     | 73.2 ± 0.8                                   |                                              |                                                                |                       | 193                                                    | 570                   | 39.7 ± 0.8                                   |                                              |                                                                |
|           | 323                                   | 10                    | 73.2 ± 0.4                                   |                                              |                                                                |                       | 213                                                    | 5000                  | 39.3 ± 0.4                                   |                                              |                                                                |
|           | 333                                   | 23                    | 73.2 ± 0.4                                   |                                              |                                                                |                       | 233                                                    | 2850                  | 39.3 ± 1.3                                   |                                              |                                                                |
|           | 343                                   | 55                    | 72.8 ± 0.4                                   |                                              |                                                                |                       | 253                                                    | 140000                | 38.9 ± 1.7                                   | 41.0 ± 5.0                                   | 8.4 ± 25.1                                                     |
|           | 353                                   | 110                   | 73.2 ± 0.8                                   | 74.0 ± 6.7                                   | 4.2 ± 20.9                                                     |                       | 273                                                    | 540000                | 38.9 ± 2.1                                   |                                              |                                                                |
|           | 363                                   | 230                   | 73.2 ± 1.3                                   |                                              |                                                                |                       |                                                        |                       |                                              |                                              |                                                                |
|           |                                       |                       |                                              |                                              |                                                                |                       |                                                        |                       |                                              |                                              |                                                                |
|           |                                       |                       |                                              |                                              |                                                                | <b>4b</b>             | 193                                                    | 33                    | 39.3 ± 0.8                                   |                                              |                                                                |
|           |                                       |                       |                                              |                                              | 203                                                            |                       | 120                                                    | 39.3 ± 0.8            |                                              |                                              |                                                                |
|           |                                       |                       |                                              |                                              | 213                                                            |                       | 570                                                    | 38.5 ± 0.8            |                                              |                                              |                                                                |
|           |                                       |                       |                                              |                                              | 223                                                            |                       | 1370                                                   | 38.5 ± 0.8            |                                              |                                              |                                                                |
|           |                                       |                       |                                              |                                              | 233                                                            |                       | 3200                                                   | 38.9 ± 1.3            | 41.0 ± 5.4                                   | 8.4 ± 25.1                                   |                                                                |
|           |                                       |                       |                                              |                                              | 243                                                            |                       | 7200                                                   | 38.9 ± 1.7            |                                              |                                              |                                                                |
|           |                                       |                       |                                              |                                              | <b>4c</b>                                                      |                       | 223                                                    | 10                    | 49.8 ± 2.1                                   |                                              |                                                                |
|           |                                       |                       |                                              |                                              |                                                                |                       | 233                                                    | 30                    | 50.2 ± 0.8                                   |                                              |                                                                |
|           |                                       |                       |                                              |                                              |                                                                | 243                   | 95                                                     | 49.8 ± 0.4            |                                              |                                              |                                                                |
|           |                                       |                       |                                              |                                              |                                                                | 253                   | 300                                                    | 49.8 ± 0.4            | 48.9 ± 5.4                                   | -4.2 ± 20.9                                  |                                                                |
|           |                                       |                       |                                              |                                              |                                                                | 263                   | 600                                                    | 50.2 ± 0.8            |                                              |                                              |                                                                |
|           |                                       |                       |                                              |                                              |                                                                | 273                   | 1500                                                   | 50.2 ± 1.3            |                                              |                                              |                                                                |
|           |                                       |                       |                                              |                                              | <b>4d</b>                                                      | 263                   | 10                                                     | 59.0                  |                                              |                                              |                                                                |
|           |                                       |                       |                                              |                                              |                                                                | 273                   | 25                                                     | 59.4                  |                                              |                                              |                                                                |
|           |                                       |                       |                                              |                                              |                                                                | 283                   | 65                                                     | 59.4                  |                                              |                                              |                                                                |
|           |                                       |                       |                                              |                                              |                                                                | 293                   | 140                                                    | 59.8                  |                                              |                                              |                                                                |
|           |                                       |                       |                                              |                                              |                                                                | 303                   | 300                                                    | 59.8                  | 53.9                                         | -20.9                                        |                                                                |
|           |                                       |                       |                                              |                                              |                                                                | 318                   | 850                                                    | 60.2                  |                                              |                                              |                                                                |

<sup>a</sup> Data for exo<sub>2</sub> → exo<sub>3</sub> ring exchange. <sup>b</sup> Data from <sup>31</sup>P NMR spectra.

| Compound              | $exo_2 \rightarrow exo_1$ |                       |                                              |                                              |                                                             | Compound             | $exo_2 \rightarrow exo_1$ |                       |                                              |                                              |                                                             |                                              |                                                             |
|-----------------------|---------------------------|-----------------------|----------------------------------------------|----------------------------------------------|-------------------------------------------------------------|----------------------|---------------------------|-----------------------|----------------------------------------------|----------------------------------------------|-------------------------------------------------------------|----------------------------------------------|-------------------------------------------------------------|
|                       | T/<br>K                   | k/<br>s <sup>-1</sup> | $\Delta G^\ddagger/$<br>kJ mol <sup>-1</sup> | $\Delta H^\ddagger/$<br>kJ mol <sup>-1</sup> | $\Delta S^\ddagger/$ J<br>K <sup>-1</sup> mol <sup>-1</sup> |                      | T/<br>K                   | k/<br>s <sup>-1</sup> | $\Delta G^\ddagger/$<br>kJ mol <sup>-1</sup> | $\Delta H^\ddagger/$<br>kJ mol <sup>-1</sup> | $\Delta S^\ddagger/$ J<br>K <sup>-1</sup> mol <sup>-1</sup> |                                              |                                                             |
| <b>7b</b>             | 173                       | 370                   | 33.0 ±<br>0.8                                | 43.9 ±<br>8.4                                | 58.6 ±<br>41.8                                              | <b>7e</b>            | 313                       | 35                    | 67.8 ±<br>0.4                                |                                              |                                                             |                                              |                                                             |
|                       | 183                       | 1300                  | 33.0 ±<br>0.4                                |                                              |                                                             |                      | 323                       | 75                    | 68.2 ±<br>0.4                                |                                              |                                                             |                                              |                                                             |
|                       | 193                       | 6500                  | 32.6 ±<br>0.8                                |                                              |                                                             |                      | 333                       | 160                   | 67.8 ±<br>0.8                                |                                              |                                                             |                                              |                                                             |
|                       | 203                       | 37000                 | 31.4 ±<br>1.3                                |                                              |                                                             |                      | 343                       | 300                   | 67.8 ±<br>1.3                                |                                              |                                                             |                                              |                                                             |
|                       |                           |                       |                                              |                                              | 353                                                         |                      | 700                       | 67.4 ±<br>2.1         |                                              |                                              |                                                             |                                              |                                                             |
| <b>7c</b>             | 173                       | 13                    | 38.1 ±<br>1.3                                | 39.3 ±<br>7.11                               | -4.2 ±<br>33.5                                              | <b>ring exchange</b> |                           |                       |                                              |                                              |                                                             |                                              |                                                             |
|                       | 183                       | 34                    | 38.9 ±<br>0.8                                |                                              |                                                             | <b>Compound</b>      | T/<br>K                   | k/<br>s <sup>-1</sup> | $\Delta G^\ddagger/$<br>kJ mol <sup>-1</sup> |                                              |                                                             | $\Delta H^\ddagger/$<br>kJ mol <sup>-1</sup> | $\Delta S^\ddagger/$ J<br>K <sup>-1</sup> mol <sup>-1</sup> |
|                       | 193                       | 65                    | 39.7 ±<br>0.8                                |                                              |                                                             |                      |                           |                       |                                              |                                              |                                                             |                                              |                                                             |
|                       | 203                       | 170                   | 40.6 ±<br>0.4                                |                                              |                                                             | 203                  | 5.0                       | 46.4 ±<br>0.8         |                                              |                                              |                                                             |                                              |                                                             |
|                       | 213                       | 500                   | 40.6 ±<br>0.8                                |                                              |                                                             | 213                  | 14                        | 46.8 ±<br>0.4         |                                              |                                              |                                                             |                                              |                                                             |
|                       | 233                       | 4000                  | 40.6 ±<br>1.7                                |                                              |                                                             | 223                  | 50                        | 46.8 ±<br>0.4         |                                              |                                              |                                                             |                                              |                                                             |
|                       | 253                       | 20000                 | 41.0 ±<br>2.1                                |                                              |                                                             | 233                  | 140                       | 46.8 ±<br>0.4         |                                              |                                              |                                                             |                                              |                                                             |
| <b>7c<sup>a</sup></b> | 183                       | 17                    | 39.8 ±<br>1.3                                |                                              |                                                             | 243                  | 400                       | 46.8 ±<br>0.8         |                                              |                                              |                                                             |                                              |                                                             |
|                       | 193                       | 50                    | 40.2 ±<br>0.8                                |                                              |                                                             | 253                  | 1600                      | 46.0 ±<br>1.3         |                                              |                                              |                                                             |                                              |                                                             |
|                       | 203                       | 150                   | 40.6 ±<br>0.4                                |                                              |                                                             | 273                  | 9500                      | 46.0 ±<br>1.7         |                                              |                                              |                                                             |                                              |                                                             |
|                       | 213                       | 520                   | 40.6 ±<br>0.4                                |                                              |                                                             | <b>7c</b>            | 243                       | 7                     | 55.3 ±<br>0.8                                | 53.6 ±<br>4.6                                | -8.4 ±<br>16.7                                              |                                              |                                                             |
|                       | 223                       | 1600                  | 40.6 ±<br>0.4                                |                                              |                                                             |                      | 253                       | 20                    | 55.3 ±<br>0.8                                |                                              |                                                             |                                              |                                                             |
|                       | 233                       | 4200                  | 40.6 ±<br>0.8                                |                                              |                                                             | 263                  | 60                        | 55.3 ±<br>0.4         |                                              |                                              |                                                             |                                              |                                                             |
| <b>7d</b>             | 203                       | 45                    | 42.7 ±<br>0.8                                | 44.8 ±<br>6.3                                | 8.4 ±<br>29.3                                               | 273                  | 160                       | 55.3 ±<br>0.4         |                                              |                                              |                                                             |                                              |                                                             |
|                       | 213                       | 190                   | 42.3 ±<br>0.4                                |                                              |                                                             | 283                  | 380                       | 55.3 ±<br>0.4         |                                              |                                              |                                                             |                                              |                                                             |
|                       | 223                       | 450                   | 42.7 ±<br>0.4                                |                                              |                                                             | 293                  | 8500                      | 55.3 ±<br>0.8         |                                              |                                              |                                                             |                                              |                                                             |
|                       | 233                       | 1120                  | 43.1 ±<br>0.4                                |                                              |                                                             | 308                  | 2400                      | 55.7 ±<br>0.8         |                                              |                                              |                                                             |                                              |                                                             |
|                       | 253                       | 9000                  | 42.7 ±<br>0.4                                |                                              |                                                             | 323                  | 8000                      | 55.3 ±<br>1.7         |                                              |                                              |                                                             |                                              |                                                             |
|                       | 273                       | 37000                 | 42.7 ±<br>0.8                                |                                              |                                                             | <b>7d</b>            | 283                       | 7                     | 64.5 ±<br>0.8                                | 66.1 ±<br>4.2                                | 8.4 ±<br>12.6                                               |                                              |                                                             |
| <b>7d<sup>a</sup></b> | 183                       | 2                     | 43.1 ±<br>1.7                                |                                              |                                                             |                      | 293                       | 30                    | 63.6 ±<br>0.4                                |                                              |                                                             |                                              |                                                             |
|                       | 193                       | 8                     | 43.1 ±<br>1.3                                |                                              |                                                             |                      |                           |                       |                                              |                                              |                                                             |                                              |                                                             |

|     |       |               |     |      |               |
|-----|-------|---------------|-----|------|---------------|
| 203 | 40    | 42.7 ±<br>0.8 | 308 | 120  | 63.2 ±<br>0.4 |
| 213 | 100   | 43.5 ±<br>0.8 | 323 | 370  | 63.6 ±<br>0.4 |
| 223 | 700   | 41.9 ±<br>0.8 | 338 | 1050 | 63.6 ±<br>0.8 |
| 233 | 1500  | 42.3 ±<br>0.8 | 353 | 2800 | 63.6 ±<br>1.3 |
| 243 | 2600  | 43.1 ±<br>0.8 |     |      |               |
| 253 | 8000  | 42.7 ±<br>1.3 |     |      |               |
| 263 | 28000 | 41.9 ±<br>1.7 |     |      |               |
| 273 | 60000 | 41.9 ±<br>2.1 |     |      |               |

<sup>a</sup> Data from <sup>1</sup>H NMR spectra

**Formatted:** Indent: Left: 1.27 cm, First line: 1.27 cm, Space Before: 3 pt, Line spacing: single

**Deleted:** ¶  
Page Break
